# Supplementary material
Source: publisher figshare collection journal article supplement (https://gsajournals.figshare.com/ndownloader/files/24973187)
Supplement: Supplementary file 1 [file 24973187]

## Sheet: Descriptive statistics
Traits	Unit	Abbreviations	min	median	max	mean	sd	%cv
Fruit weight	g	F.Weight	30.60	58.90	97.80	59.61	12.71	21.32
Hue ground	degrees	Hue.g	61.51	75.64	98.55	76.25	6.49	8.51
Ethylene production	nmol kg-1h-1	Ethylene	1.95	6.43	9.60	6.14	1.83	29.74
Refractive index	% Brix	RI	9.60	13.80	20.60	14.00	1.85	13.22
Sucrose content	g 100 g-1 of fresh weight	Sucrose	3.29	6.39	11.83	6.46	1.27	19.71
Glucose content	g 100 g-1 of fresh weight	Glucose	0.39	1.60	3.10	1.62	0.34	20.67
Fructose content	g 100 g-1 of fresh weight	Fructose	0.15	0.78	3.44	0.80	0.24	30.41
Titratable acidity	meq 100 g-1 of fresh weight	TA	11.27	24.13	41.05	24.54	5.15	21.00
Citric acid content	meq 100 g-1 of fresh weight	Citric.A.	8.01	20.71	45.26	21.10	5.07	24.04
Malic acid content	meq 100 g-1 of fresh weight	Malic.A.	4.09	7.81	17.92	8.09	2.15	26.61
